# Supplementary material for: Chronic nicotinamide riboside supplementation is well-tolerated and elevates NAD+ in healthy middle-aged and older adults
Source: PubMed Central journal article supplement (PMC5876407; doi:10.1038/s41467-018-03421-7), 2018-03-29
Supplement: 41467_2018_3421_MOESM1_ESM.pdf [file 41467_2018_3421_MOESM1_ESM.pdf]

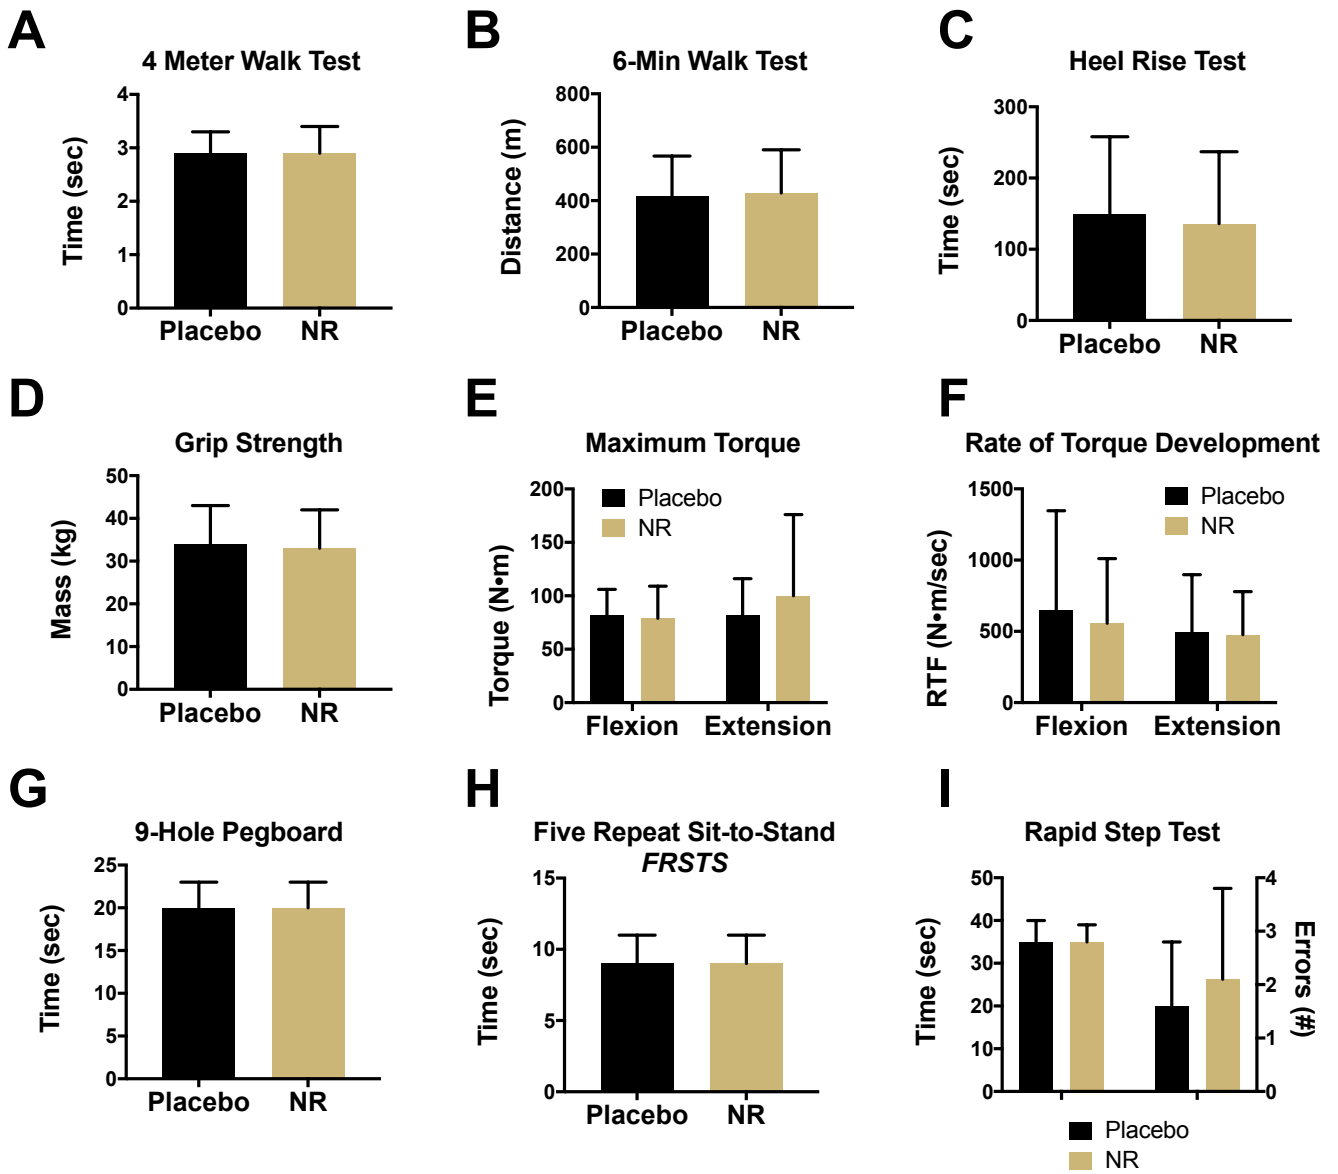

**Supplementary Figure 1.** Effect of 6 weeks of oral placebo vs. NR supplementation on measures of motor function. Data are mean  $\pm$  SD.

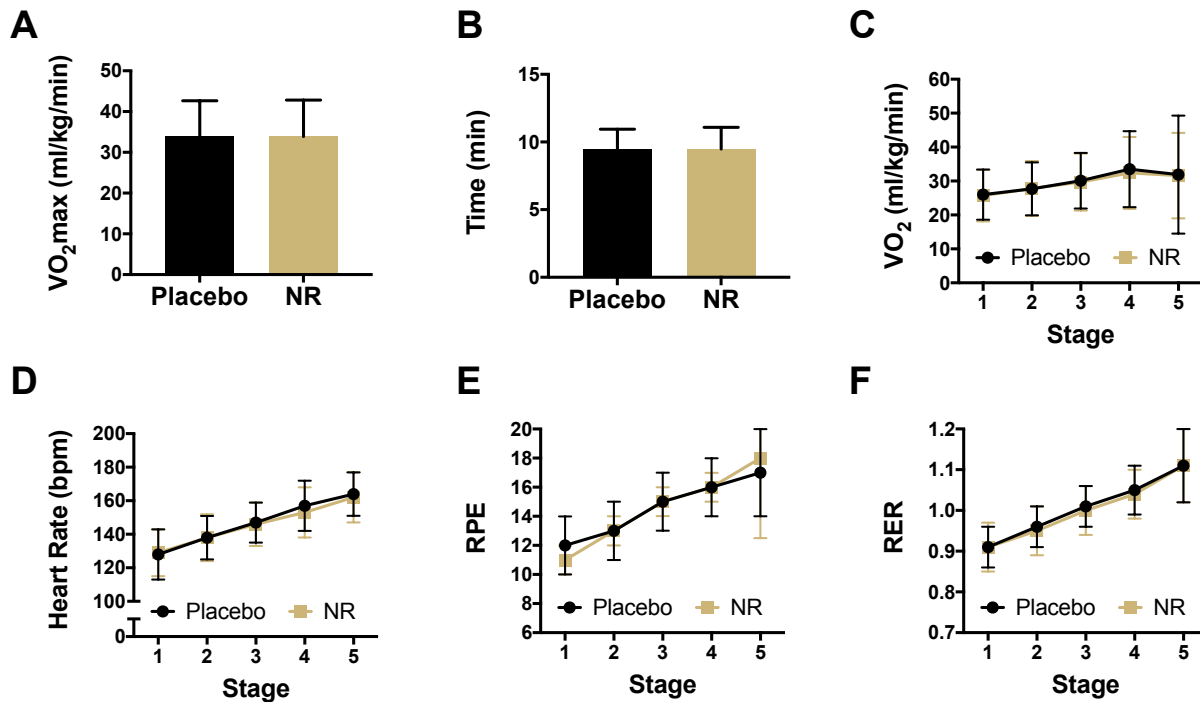

**Supplementary Figure 2.** Effect of 6 weeks of oral placebo vs. NR supplementation on (A) maximal oxygen uptake, (B) treadmill time to exhaustion and submaximal measures of exercise performance including (C) oxygen uptake, (D) heart rate, (E) ratings of perceived exertion and (F) respiratory exchange ratio (RER) during a graded exercise test on a treadmill. Data are mean  $\pm$  SD. N = 21.

**Supplementary Table 1.** Complete blood count with differential collected after 6 weeks of oral placebo vs. NR supplementation with standard reference range. Data are mean  $\pm$  SD. N = 21 subjects.

|                                                         | <b>Placebo</b>  | <b>NR</b>       | <b>Reference Range</b>                            |
|---------------------------------------------------------|-----------------|-----------------|---------------------------------------------------|
| HGB (g dL <sup>-1</sup> )                               | 13.8 $\pm$ 1.2  | 13.8 $\pm$ 1.1  | 12.6 – 16.3 g dL <sup>-1</sup>                    |
| HCT (%)                                                 | 40.9 $\pm$ 3.2  | 40.9 $\pm$ 3.2  | 38.0 – 47.0 %                                     |
| WBC (10 <sup>3</sup> $\mu$ L <sup>-1</sup> )            | 4.5 $\pm$ 1.2   | 4.3 $\pm$ 1.2   | 3.8 – 9.5 10 <sup>3</sup> $\mu$ L <sup>-1</sup>   |
| RBC (10 <sup>6</sup> $\mu$ L <sup>-1</sup> )            | 4.5 $\pm$ 0.4   | 4.4 $\pm$ 0.4   | 4.18 – 5.33 10 <sup>6</sup> $\mu$ L <sup>-1</sup> |
| RDW (%)                                                 | 12.9 $\pm$ 0.6  | 13.0 $\pm$ 0.7  | 11.5 – 15.2 %                                     |
| MCV (fL)                                                | 92.1 $\pm$ 4.6  | 92.3 $\pm$ 4.1  | 81.5 – 99.8 fL                                    |
| MCH (pg)                                                | 31.1 $\pm$ 1.4  | 31.2 $\pm$ 1.5  | 27.9 – 34.1 pg                                    |
| MCHC (g dL <sup>-1</sup> )                              | 33.8 $\pm$ 0.7  | 33.8 $\pm$ 0.9  | 32.4 – 36.7 g dL <sup>-1</sup>                    |
| MPV (fL)                                                | 10.8 $\pm$ 1.0  | 10.6 $\pm$ 1.0  | 8.7 – 11.7 fL                                     |
| Platelet count (10 <sup>3</sup> $\mu$ L <sup>-1</sup> ) | 198 $\pm$ 50    | 206 $\pm$ 65    | 150 – 400 10 <sup>3</sup> $\mu$ L <sup>-1</sup>   |
| <b>Lymphocytes</b>                                      |                 |                 |                                                   |
| Relative (%)                                            | 29.5 $\pm$ 6.7  | 29.5 $\pm$ 7.6  | 15.0 – 45.0 %                                     |
| Absolute (10 <sup>3</sup> $\mu$ L <sup>-1</sup> )       | 1.3 $\pm$ 0.4   | 1.2 $\pm$ 0.4   | 1.00 – 3.00 10 <sup>3</sup> $\mu$ L <sup>-1</sup> |
| <b>Monocytes</b>                                        |                 |                 |                                                   |
| Relative (%)                                            | 10.2 $\pm$ 2.1  | 10.6 $\pm$ 2.5  | 4.5 – 13.0 %                                      |
| Absolute (10 <sup>3</sup> $\mu$ L <sup>-1</sup> )       | 0.5 $\pm$ 0.1   | 0.5 $\pm$ 0.2   | 0.30 – 0.80 10 <sup>3</sup> $\mu$ L <sup>-1</sup> |
| <b>Neutrophils</b>                                      |                 |                 |                                                   |
| Relative (%)                                            | 55.9 $\pm$ 6.0  | 55.3 $\pm$ 6.6  | 39.3 – 74.2 %                                     |
| Absolute (10 <sup>3</sup> $\mu$ L <sup>-1</sup> )       | 2.5 $\pm$ 0.8   | 2.4 $\pm$ 0.8   | 1.70 – 6.50 10 <sup>3</sup> $\mu$ L <sup>-1</sup> |
| <b>Eosinophils</b>                                      |                 |                 |                                                   |
| Relative (%)                                            | 3.5 $\pm$ 2.4   | 3.1 $\pm$ 2.2   | 0.6 – 7.6 %                                       |
| Absolute (10 <sup>3</sup> $\mu$ L <sup>-1</sup> )       | 0.2 $\pm$ 0.2   | 0.1 $\pm$ 0.1   | 0.03 – 0.40 10 <sup>3</sup> $\mu$ L <sup>-1</sup> |
| <b>Basophils</b>                                        |                 |                 |                                                   |
| Relative (%)                                            | 0.9 $\pm$ 0.3   | 1.2 $\pm$ 1.0   | 0.3 – 1.7 %                                       |
| Absolute (10 <sup>3</sup> $\mu$ L <sup>-1</sup> )       | 0.04 $\pm$ 0.02 | 0.05 $\pm$ 0.03 | 0.02 – 0.10 10 <sup>3</sup> $\mu$ L <sup>-1</sup> |

Data are mean  $\pm$  standard deviation (SD); HGB, hemoglobin; HCT, hematocrit; WBC, white blood count; RBC, red blood count; RDW, red cell distribution width; MCV, mean corpuscular volume; MCH, mean corpuscular hemoglobin; MCHC, mean corpuscular hemoglobin concentration; MPV, mean platelet volume. \*P < 0.05 vs. placebo.

**Supplementary Table 2.** Comprehensive metabolic panel collected after 6 weeks of oral placebo vs. NR supplementation with standard reference range. Data are mean  $\pm$  SD. N = 21 subjects.

|                                        | <b>Placebo</b> | <b>NR</b>     | <b>Reference Range</b>         |
|----------------------------------------|----------------|---------------|--------------------------------|
| Total protein (g dL <sup>-1</sup> )    | 6.3 $\pm$ 0.5  | 6.3 $\pm$ 0.5 | 6.3 – 8.2 g dL <sup>-1</sup>   |
| Albumin (g dL <sup>-1</sup> )          | 3.7 $\pm$ 0.3  | 3.6 $\pm$ 0.3 | 3.5 – 5.0 g dL <sup>-1</sup>   |
| AST (SGOT) (IU L <sup>-1</sup> )       | 33 $\pm$ 13    | 32 $\pm$ 7    | 14 – 46 IU L <sup>-1</sup>     |
| Alk phosphatase (IU L <sup>-1</sup> )  | 64 $\pm$ 15    | 63 $\pm$ 13   | 38 – 126 IU L <sup>-1</sup>    |
| Total bilirubin (mg dL <sup>-1</sup> ) | 0.8 $\pm$ 0.4  | 0.8 $\pm$ 0.4 | 0.1 – 1.4 mg dL <sup>-1</sup>  |
| ALT (SGPT) (IU L <sup>-1</sup> )       | 32 $\pm$ 8     | 31 $\pm$ 11   | 9 – 52 IU L <sup>-1</sup>      |
| Creatinine (mg dL <sup>-1</sup> )      | 0.9 $\pm$ 0.2  | 0.9 $\pm$ 0.2 | 0.6 – 1.0 mg dL <sup>-1</sup>  |
| BUN (mg dL <sup>-1</sup> )             | 18 $\pm$ 5     | 17 $\pm$ 4    | 7 – 23 mg dL <sup>-1</sup>     |
| eGFR (ml/min 1.73m <sup>-2</sup> )     | 75 $\pm$ 14    | 74 $\pm$ 14   | $\geq$ 60 mg dL <sup>-1</sup>  |
| Calcium (mg dL <sup>-1</sup> )         | 9.2 $\pm$ 0.3  | 9.2 $\pm$ 0.3 | 8.5 – 10.4 mg dL <sup>-1</sup> |
| Glucose (mg dL <sup>-1</sup> )         | 87 $\pm$ 7     | 87 $\pm$ 7    | 70 – 100 mg dL <sup>-1</sup>   |
| Sodium (mEq L <sup>-1</sup> )          | 139 $\pm$ 2    | 139 $\pm$ 2   | 134 – 144 mEq L <sup>-1</sup>  |
| Potassium (mEq L <sup>-1</sup> )       | 4.2 $\pm$ 0.3  | 4.2 $\pm$ 0.3 | 3.5 – 5.2 mEq L <sup>-1</sup>  |
| Chloride (mEq L <sup>-1</sup> )        | 104 $\pm$ 3    | 104 $\pm$ 3   | 97 – 110 mEq L <sup>-1</sup>   |
| CO <sub>2</sub> (mEq L <sup>-1</sup> ) | 26 $\pm$ 3     | 26 $\pm$ 3    | 22 – 31 mEq L <sup>-1</sup>    |

Data are mean  $\pm$  standard deviation (SD); AST, aspartate aminotransferase; SGOT, serum-oxaloacetic transaminase; alk, alkaline; ALT, alanine aminotransferase; SGPT, serum glutamic-pyruvic transaminase; BUN, blood urea nitrogen; eGFR, estimated glomerular filtration rate; CO<sub>2</sub>, carbon dioxide.

**Supplementary Table 3.** Total lipid panel collected after 6 weeks of oral placebo vs. NR supplementation with standard reference range. Data are mean  $\pm$  SD. N = 21 subjects.

|                                          | <b>Placebo</b> | <b>NR</b>    | <b>Reference Range</b>        |
|------------------------------------------|----------------|--------------|-------------------------------|
| Total cholesterol (mg dL <sup>-1</sup> ) | 167 $\pm$ 24   | 171 $\pm$ 29 | 140 – 220 mg dL <sup>-1</sup> |
| Triglycerides (mg dL <sup>-1</sup> )     | 90 $\pm$ 74    | 90 $\pm$ 62  | 35 – 135 mg dL <sup>-1</sup>  |
| HDL-C (mg dL <sup>-1</sup> )             | 60 $\pm$ 20    | 60 $\pm$ 21  | 40 – 85 mg dL <sup>-1</sup>   |
| LDL-C (mg dL <sup>-1</sup> )             | 90 $\pm$ 20    | 94 $\pm$ 25  | 80 – 100 mg dL <sup>-1</sup>  |
| VLDL-C (mg dL <sup>-1</sup> )            | 18 $\pm$ 15    | 18 $\pm$ 12  | 8 – 25 mg dL <sup>-1</sup>    |
| N-HDL-C (mg dL <sup>-1</sup> )           | 108 $\pm$ 27   | 111 $\pm$ 30 | 90 – 129 mg dL <sup>-1</sup>  |

Data are mean  $\pm$  standard deviation (SD); HDL-C, high-density lipoprotein cholesterol; LDL-C, low-density lipoprotein cholesterol; VLDL-C, very low-density lipoprotein cholesterol; N-HDL-C, non-HDL cholesterol.

**Supplementary Table 4.** Comprehensive nucleotide metabolite concentrations in peripheral blood mononuclear cells after oral placebo vs. NR supplementation normalized to total protein content. Data are mean  $\pm$  SD. N=21.

| Metabolite (pMol per mg protein) | Placebo            | NR                  |
|----------------------------------|--------------------|---------------------|
| NaM                              | 277.4 $\pm$ 72.8   | 383.8 $\pm$ 282.7   |
| Adenosine                        | 10.1 $\pm$ 4.8     | 14.4 $\pm$ 9.7 *    |
| Uridine                          | 128.0 $\pm$ 60.2   | 278.3 $\pm$ 718.4   |
| NR                               | < LOQ              | < LOQ               |
| Cytidine                         | 2.9 $\pm$ 3.7      | 4.7 $\pm$ 6.6       |
| Guanosine                        | 1.5 $\pm$ 5.4      | 0.5 $\pm$ 1.5       |
| 2-3 cAMP                         | 0.0 $\pm$ 0.0      | 0.0 $\pm$ 0.0       |
| 3-5 cAMP                         | 0.0 $\pm$ 0.0      | 0.0 $\pm$ 0.0       |
| cCMP                             | 0.0 $\pm$ 0.0      | 1.8 $\pm$ 8.4       |
| NAD+                             | 10.1 $\pm$ 6.7     | 16.2 $\pm$ 14.1 *   |
| NMN                              | 0.5 $\pm$ 1.3      | 1.2 $\pm$ 3.3       |
| cGMP                             | 0.0 $\pm$ 0.0      | 0.0 $\pm$ 0.0       |
| NAAD                             | 0.2 $\pm$ 0.6      | 1.4 $\pm$ 2.2 *     |
| FAD                              | 9.9 $\pm$ 4.6      | 10.2 $\pm$ 5.9      |
| CMP                              | 48.8 $\pm$ 25.1    | 137.2 $\pm$ 366.0   |
| AMP                              | 269.6 $\pm$ 132.8  | 770.8 $\pm$ 1884.3  |
| UMP                              | 551.2 $\pm$ 243.7  | 1113.7 $\pm$ 2374.2 |
| GMP                              | 513.9 $\pm$ 195.5  | 1010.1 $\pm$ 2114.8 |
| NADP                             | 7.7 $\pm$ 4.0      | 8.9 $\pm$ 8.7       |
| CDP                              | 34.8 $\pm$ 16.0    | 67.7 $\pm$ 113.1    |
| UDP                              | 151.2 $\pm$ 79.5   | 270.0 $\pm$ 420.7   |
| ADP                              | 566.2 $\pm$ 231.6  | 1133.8 $\pm$ 1880.4 |
| GDP                              | 115.3 $\pm$ 51.0   | 198.4 $\pm$ 329.0   |
| CTP                              | 22.6 $\pm$ 12.4    | 41.0 $\pm$ 68.4     |
| UTP                              | 276.1 $\pm$ 123.5  | 340.3 $\pm$ 150.1   |
| ATP                              | 1736.3 $\pm$ 861.7 | 2435.7 $\pm$ 1230.3 |
| GTP                              | 279.5 $\pm$ 114.2  | 327.1 $\pm$ 119.1   |

\*  $p < 0.05$ . Data are mean  $\pm$  SD. N = 21.

**Supplementary Table 5.** Acquisition parameters used for the LC/MS/MS analysis of nucleotides, nucleosides and NAD<sup>+</sup> metabolites. Optimal parameters were determined by flow injection analysis of authentic standards.

| Compound name                                | Transition     | Collision Energy | Retention time | Associated internal standard |
|----------------------------------------------|----------------|------------------|----------------|------------------------------|
| NaM (niacinamide)                            | 123.1 -> 80.0  | 20               | 0.79           | Nicotinamide 13C6            |
| Adenosine                                    | 268.1 -> 136.1 | 16               | 2.21           | Adenosine (ribose-13C5)      |
| Uridine                                      | 245.1 -> 113.0 | 8                | 2.27           | Adenosine (ribose-13C5)      |
| Nicotinamide riboside                        | 255.1 -> 123.1 | 8                | 2.53           | Nicotinamide riboside-d2     |
| Cytidine                                     | 244.1 -> 112.1 | 8                | 2.60           | Adenosine (ribose-13C5)      |
| Guanosine                                    | 284.1 -> 152.1 | 8                | 3.18           | Adenosine (ribose-13C5)      |
| 2,3-cAMP                                     | 330.1 -> 136.1 | 20               | 3.93           | ATP (ribose-d4)              |
| 3,5-cAMP                                     | 330.1 -> 136.1 | 24               | 4.09           | Adenosine (ribose-13C5)      |
| cCMP                                         | 306.1 -> 112.1 | 20               | 4.47           | ATP (ribose-d4)              |
| NAD <sup>+</sup>                             | 664.1 -> 136.0 | 56               | 4.63           | ATP (ribose-d4)              |
| NmN                                          | 335.1 -> 123.0 | 12               | 4.83           | ATP (ribose-d4)              |
| cGMP                                         | 346.1 -> 152.1 | 20               | 5.11           | ATP (ribose-d4)              |
| NAAD                                         | 665.1 -> 136.0 | 56               | 5.24           | ATP (ribose-d4)              |
| FAD                                          | 786.2 -> 136.1 | 44               | 5.47           | ATP (ribose-d4)              |
| CMP                                          | 324.1 -> 112.1 | 8                | 5.54           | Adenosine (ribose-13C5)      |
| AMP                                          | 348.1 -> 136.1 | 16               | 5.64           | Adenosine (ribose-13C5)      |
| UMP                                          | 325.1 -> 97.0  | 12               | 5.67           | Adenosine (ribose-13C5)      |
| GMP                                          | 364.1 -> 152.1 | 12               | 6.12           | Adenosine (ribose-13C5)      |
| NADP <sup>+</sup>                            | 744.1 -> 136.0 | 72               | 6.30           | ATP (ribose-d4)              |
| CDP                                          | 404.0 -> 112.1 | 16               | 6.52           | Adenosine (ribose-13C5)      |
| UDP                                          | 405.0 -> 97.1  | 16               | 6.73           | Adenosine (ribose-13C5)      |
| ADP                                          | 428.0 -> 136.1 | 28               | 6.73           | Adenosine (ribose-13C5)      |
| GDP                                          | 444.0 -> 152.1 | 20               | 7.20           | Adenosine (ribose-13C5)      |
| CTP                                          | 484.0 -> 112.1 | 20               | 7.36           | Adenosine (ribose-13C5)      |
| UTP                                          | 485.0 -> 97.1  | 24               | 7.55           | ATP (ribose-d4)              |
| ATP                                          | 508.0 -> 410.0 | 60               | 7.68           | ATP (ribose-d4)              |
| GTP                                          | 524.0 -> 135.0 | 16               | 8.34           | ATP (ribose-d4)              |
| Nicotinamide 13C6 (internal standard)        | 129.1 -> 85.1  | 24               | 0.78           | -                            |
| Adenosine ribose-13C5 (internal standard)    | 273.1 -> 136.0 | 16               | 2.22           | -                            |
| Nicotinamide riboside-d2 (internal standard) | 257.1 -> 124.1 | 8                | 2.56           | -                            |
| ATP ribose-d4 (internal standard)            | 512.0 -> 136.0 | 36               | 7.65           | -                            |

**Supplementary Table 6.** Median and range for systolic blood pressure (SBP), diastolic blood pressure (DBP), pulse pressure (PP), pulse wave velocity (PWV), carotid compliance (CC) and flow-mediated dilation (FMD) in all subjects at each time point (N = 24).

| Outcome                                                     | Median  |       | Range       |             |
|-------------------------------------------------------------|---------|-------|-------------|-------------|
|                                                             | Placebo | NR    | Placebo     | NR          |
| SBP (mmHg)                                                  | 123     | 115   | 87-157      | 85-143      |
| DBP (mmHg)                                                  | 71      | 70    | 55-87       | 51-90       |
| PP (mmHg)                                                   | 51      | 45    | 28-79       | 30-71       |
| PWV (cm sec <sup>-1</sup> )                                 | 791     | 796   | 581-1166    | 536-1009    |
| CC (mm <sup>2</sup> mmHg <sup>-1</sup> x 10 <sup>-2</sup> ) | 0.074   | 0.081 | 0.029-0.272 | 0.021-0.202 |
| FMD (%)                                                     | 4.1     | 4.1   | 1.0-7.0     | 2.0-8.8     |



**Supplementary Table 7.** Effect of NR on body composition and metabolic function. Data are mean  $\pm$  SD. 1 G is equivalent to the acceleration of gravity ( $9.8 \text{ m/s}^2$ ). Blood values missing for 3 subjects (N = 21); IVGTT performed in a subset of subjects (N=13); all other measures (N = 24).

|                                                             | Placebo         | NR              | Sample Size (N) |
|-------------------------------------------------------------|-----------------|-----------------|-----------------|
| <b><i>Anthropometry</i></b>                                 |                 |                 |                 |
| Body Mass (kg)                                              | 69 $\pm$ 15     | 69 $\pm$ 15     | 24              |
| BMI ( $\text{kg m}^{-2}$ )                                  | 24 $\pm$ 5      | 24 $\pm$ 5      | 24              |
| Total body fat (%)                                          | 28.0 $\pm$ 10.1 | 27.6 $\pm$ 10.0 | 23              |
| <b><i>Energy Intake and Expenditure</i></b>                 |                 |                 |                 |
| Energy Intake ( $\text{Kcal day}^{-1}$ )                    | 1,991 $\pm$ 465 | 1,937 $\pm$ 486 | 17              |
| Physical Activity ( $1 \times 10^{-3} \text{ G day}^{-1}$ ) | 319 $\pm$ 125   | 301 $\pm$ 119   | 19              |
| Resting Metabolic Rate ( $\text{Kcal day}^{-1}$ )           | 1,417 $\pm$ 230 | 1,438 $\pm$ 218 | 22              |
| Respiratory Exchange Ratio (RER)                            | 0.81 $\pm$ 0.04 | 0.81 $\pm$ 0.04 | 22              |
| <b><i>Glucose/Insulin Function</i></b>                      |                 |                 |                 |
| Fasting Glucose ( $\text{mg dL}^{-1}$ )                     | 93 $\pm$ 9      | 93 $\pm$ 9      | 21              |
| Fasting Insulin ( $\text{mg dL}^{-1}$ )                     | 6.9 $\pm$ 2.4   | 7.0 $\pm$ 2.7   | 21              |
| HOMA-IR                                                     | 1.6 $\pm$ 0.6   | 1.6 $\pm$ 0.6   | 21              |
| HOMA- $\beta$                                               | 88.3 $\pm$ 36.5 | 85.9 $\pm$ 34.8 | 21              |
| Insulin Sensitivity (IVGTT)                                 | 4.53 $\pm$ 3.72 | 3.82 $\pm$ 1.88 | 13              |

**Supplementary Table 8.** Characteristics of subjects who dropped out of the study compared with those who completed and all subjects randomized. Data are mean  $\pm$  SD.

| <b>Subject Characteristic</b>            | <b><i>Dropouts</i></b> | <b><i>Completers</i></b> | <b>All Subjects</b> |
|------------------------------------------|------------------------|--------------------------|---------------------|
| Sex (M/F)                                | 2/4                    | 5/7                      | 13/17               |
| Age (years)                              | 65 $\pm$ 5             | 65 $\pm$ 7               | 65 $\pm$ 7          |
| Mass (kg)                                | 73 $\pm$ 12            | 68 $\pm$ 15              | 69 $\pm$ 14         |
| BMI (kg/m <sup>2</sup> )                 | 26 $\pm$ 3             | 24 $\pm$ 4               | 24 $\pm$ 4          |
| Total body fat (%)                       | 37 $\pm$ 9             | 28 $\pm$ 10              | 30 $\pm$ 10         |
| Systolic Blood Pressure (mm Hg)          | 126 $\pm$ 23           | 121 $\pm$ 17             | 122 $\pm$ 18        |
| Diastolic Blood Pressure (mm Hg)         | 74 $\pm$ 14            | 74 $\pm$ 10              | 74 $\pm$ 11         |
| Fasting Glucose (mg dL <sup>-1</sup> )   | 87 $\pm$ 4             | 88 $\pm$ 8               | 88 $\pm$ 7          |
| Total Cholesterol (mg dL <sup>-1</sup> ) | 225 $\pm$ 55           | 187 $\pm$ 36             | 195 $\pm$ 43        |
| HDL Cholesterol (mg dL <sup>-1</sup> )   | 58 $\pm$ 17            | 69 $\pm$ 19              | 67 $\pm$ 19         |
| LDL Cholesterol (mg dL <sup>-1</sup> )   | 141 $\pm$ 40           | 101 $\pm$ 30             | 109 $\pm$ 36        |

**Supplementary Table 9.** Pair-wise correlation of primary cardiovascular outcomes (combined post-NR and post-placebo data). Data represent Pearson correlation coefficient with P-value in parentheses.

|            | <b>SBP</b>                        | <b>DBP</b>                       | <b>PP</b>                         | <b>PWV</b>       | <b>CC</b>        | <b>FMD</b>      |
|------------|-----------------------------------|----------------------------------|-----------------------------------|------------------|------------------|-----------------|
| <b>SBP</b> |                                   | 0.74<br>( $1.7 \times 10^{-9}$ ) | 0.87<br>( $6.7 \times 10^{-16}$ ) | 0.54<br>(0.0001) | -0.45<br>(0.003) | 0.23<br>(0.137) |
| <b>DBP</b> | 0.74<br>( $1.7 \times 10^{-9}$ )  |                                  | 0.32<br>(0.027)                   | 0.41<br>(0.0052) | -0.41<br>(0.007) | 0.29<br>(0.067) |
| <b>PP</b>  | 0.87<br>( $6.7 \times 10^{-16}$ ) | 0.32<br>(0.027)                  |                                   | 0.46<br>(0.0014) | -0.34<br>(0.029) | 0.10<br>(0.520) |
| <b>PWV</b> | 0.54<br>(0.0001)                  | 0.41<br>(0.005)                  | 0.46<br>(0.0014)                  |                  | -0.19<br>(0.252) | 0.07<br>(0.640) |
| <b>CC</b>  | -0.45<br>(0.0026)                 | -0.41<br>(0.007)                 | -0.34<br>(0.029)                  | -0.19<br>(0.252) |                  | 0.02<br>(0.900) |
| <b>FMD</b> | 0.23<br>(0.137)                   | 0.29<br>(0.067)                  | 0.10<br>(0.520)                   | 0.07<br>(0.640)  | 0.02<br>(0.900)  |                 |
